# Supplementary material for: Tethering of spherical DOTAP liposome gold nanoparticles on cysteamine monolayer for sensitive label free electrochemical detection of DNA and transfection
Source: Royal Society of Chemistry journal article supplement (doi:10.1039/c4an00017j), 2014-01-01

## Supplementary

### **Tethering of spherical DOTAP liposome gold nanoparticles on cysteamine monolayer for sensitive label free electrochemical detection of DNA and transfection**

**Mohanlal Bhuvana and Venkataraman Dharuman**

*Molecular Electronics Laboratory, Department of Bioelectronics and Biosensors, Science Block, Alagappa University, Karaikudi – 630 004*

*India.*

*\*To whom correspondence should be addressed. V. Dharuman, E-mail: [dharamanudhay@yahoo.com](mailto:dharamanudhay@yahoo.com) Phone: 91-4565-226385 Fax: 91-4565-225202*

**Fig.S1.** FTIR Spectrum in the frequency range of 900-1500 (A) and 2200 to 3000 (B). Curve a. AuNP, Curve b. DOTAP, Curve c. DOTAP + AuNP, Curve d. DOTAP + ssDNA, Curve e. DOTAP+AuNP+ssDNA, Curve f. ssDNA, recorded in solution phase.

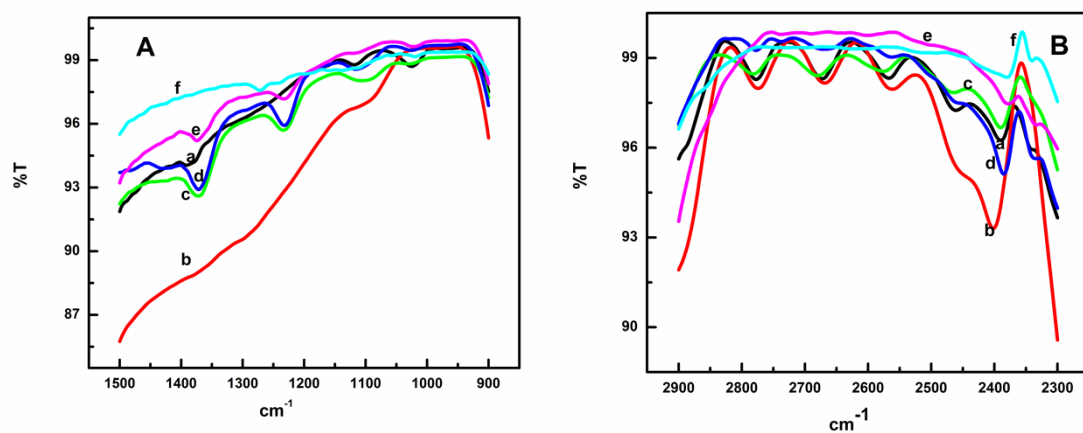

**Fig.S2.** UV-Visible spectra for AuNP, DOTAP, DOTAP-AuNP

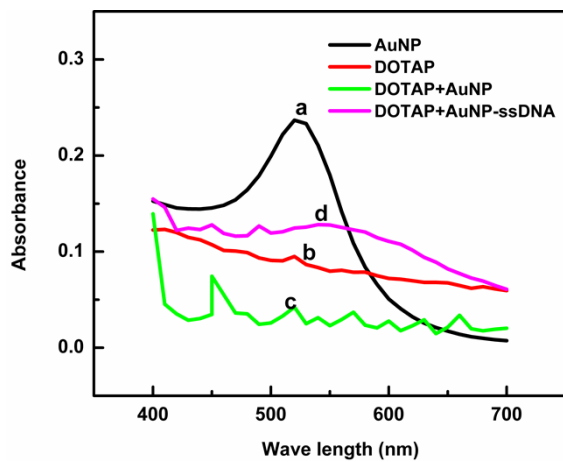

Fig. S3: CV behavior of bare Au (curve a), sequentially modified with cysteamine (curve b), AuNP - DOTAP (curve c) and HS-ssDNA (curve d) in presence of 1mM  $[\text{Ru}(\text{NH}_3)_6]^{3+}$  in PBS buffer pH 7.4

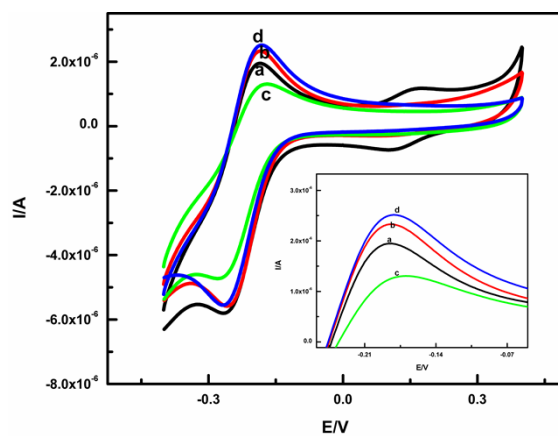

**Fig.S4. EIS behavior of gold electrode (curve a, unmodified) on modification using DOTA (curve b), DOTAP-AuNP (curve c), Cysteamine DOTAP-AuNP (curve d) and cysteamine (curve e) monolayers in phosphate buffer pH 7.4 measured in the frequency range 100 kHz to 1 Hz. The equivalent circuit fit data is shown in another figure for clarity of presentation.**

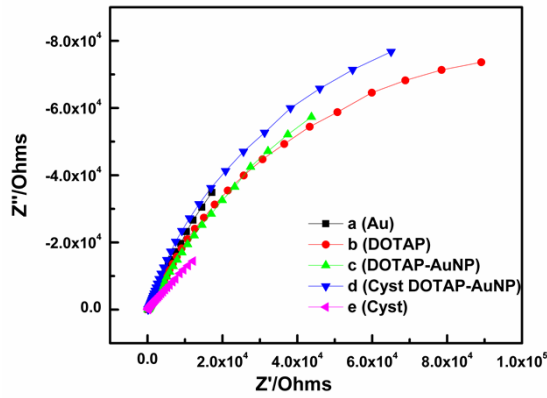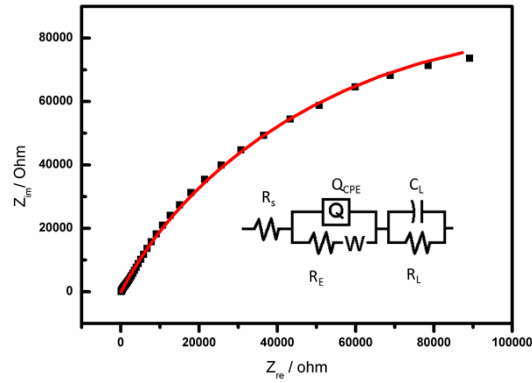

Fig. S5. DNA hybridization detection at cysteamine-DOTAP-AuNP modified gold electrode in phosphate buffer pH 7.4. Curve a: Single stranded DNA. Curve b: Double stranded DNA (fully complementary). Non complementary behavior is shown as insert. **A. CV and B . EIS**

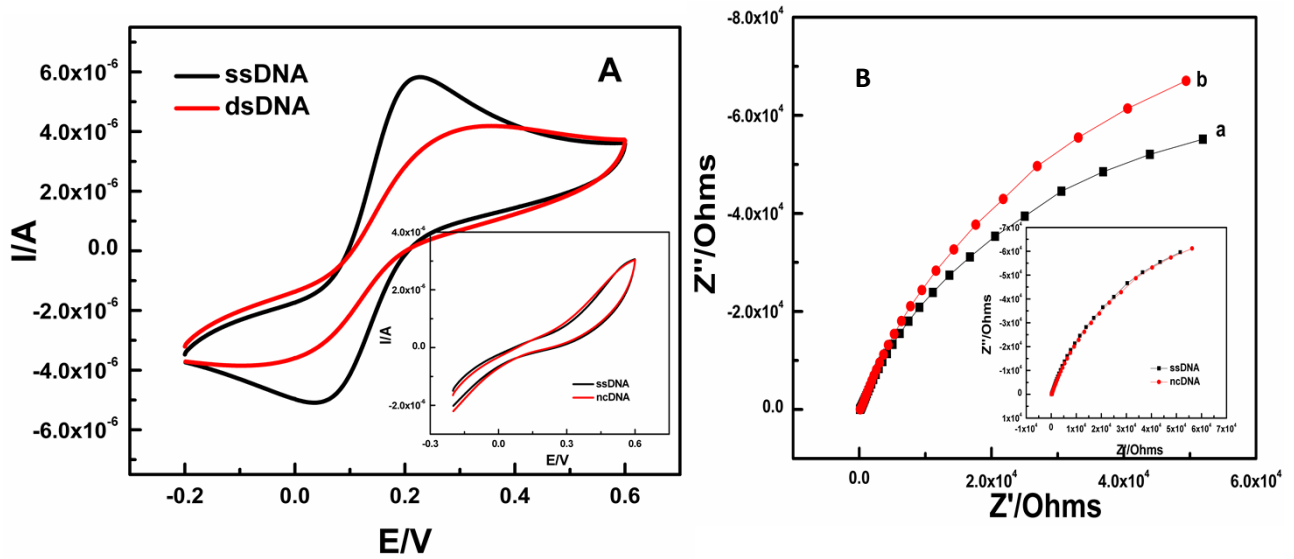

**Fig.S6.**  $\Delta R_L$  change noticed from EIS measurements for the complementary, non-complementary and single nucleotide polymorphism target DNA concentration in presence of 1 mM  $[\text{Fe}(\text{CN})_6]^{3-/4-}$  at cysteamine DOTAP-AuNP

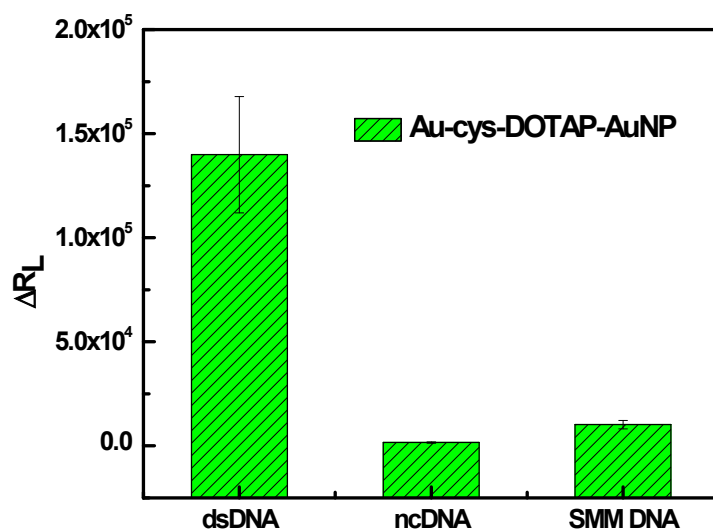

**Fig.S7.** DPV peak current change noticed for the complementary, non-complementary target DNA concentration in presence of 1 mM  $[\text{Fe}(\text{CN})_6]^{3-/4-}$  at cysteamine DOTAP-AuNP

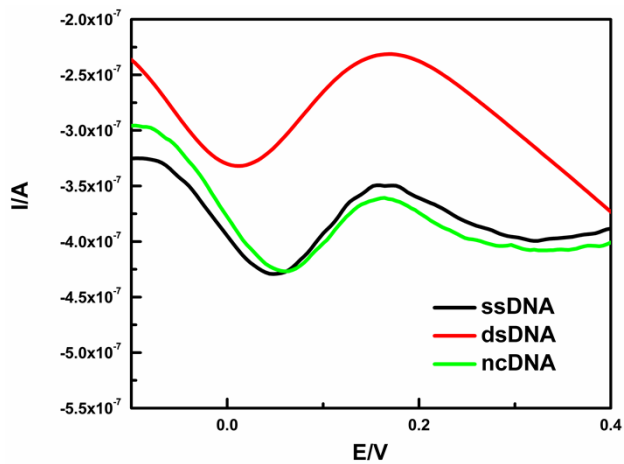

Fig.S8. Comparative images of DOTAP measured using optical microscope (A) and HRTEM technique (B).

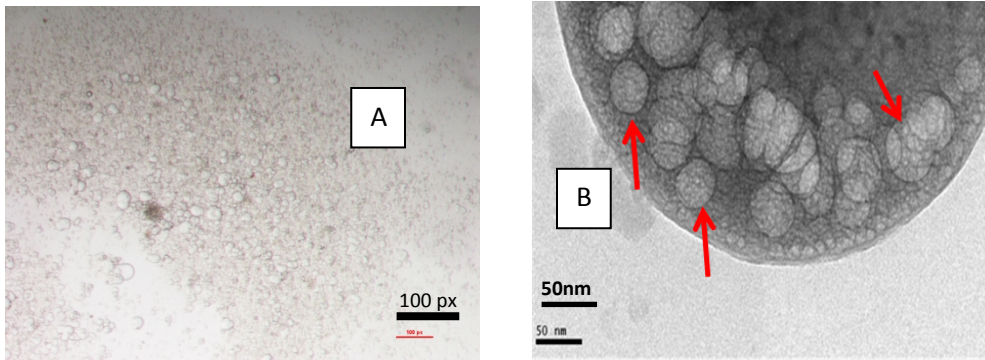

Supplement: c4an00017j1.pdf [file c4an00017j1.pdf]
